# Supplementary material for: σ-Hole, lone-pair-hole, and π-hole site-based interactions in aerogen-comprising complexes: a comparative study
Source: Royal Society of Chemistry journal article supplement (doi:10.1039/d4ra03614j), 2024-01-01
Supplement: d4ra03614j1.pdf [file d4ra03614j1.pdf]

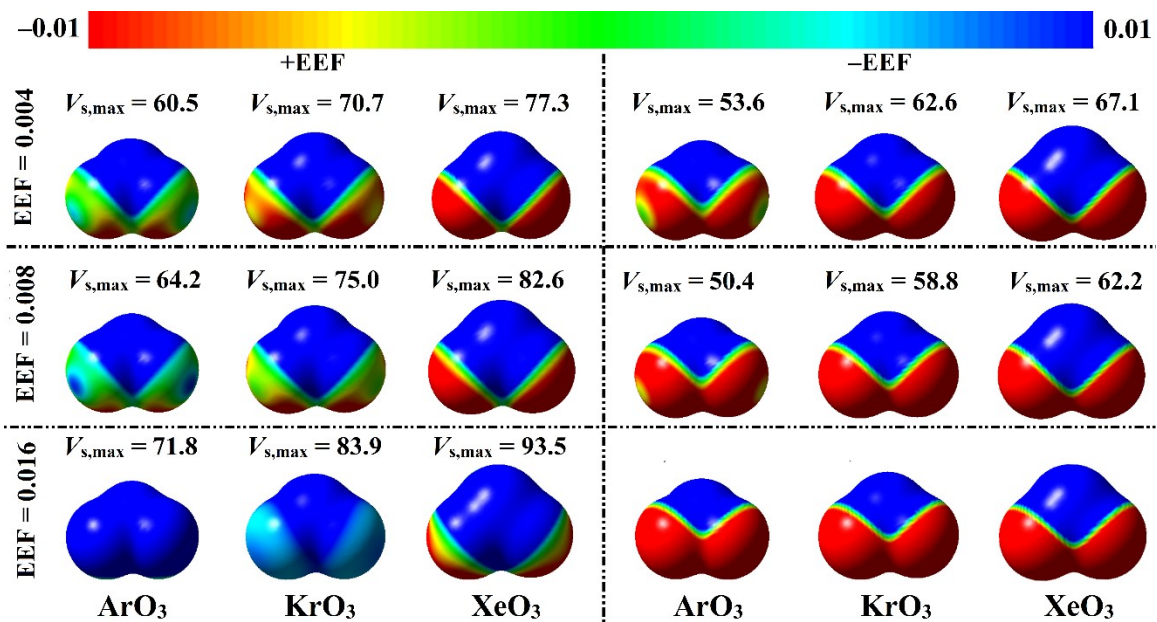

**Figure S1.** MEP maps of the optimized  $ZO_3$  monomers under the positively- and negatively-oriented EEF with magnitudes of 0.004-0.016 au.  $V_{s,\text{max}}$  values at the aerogen  $\sigma$ -hole site of the optimized  $ZO_3$  monomers are in kcal/mol.

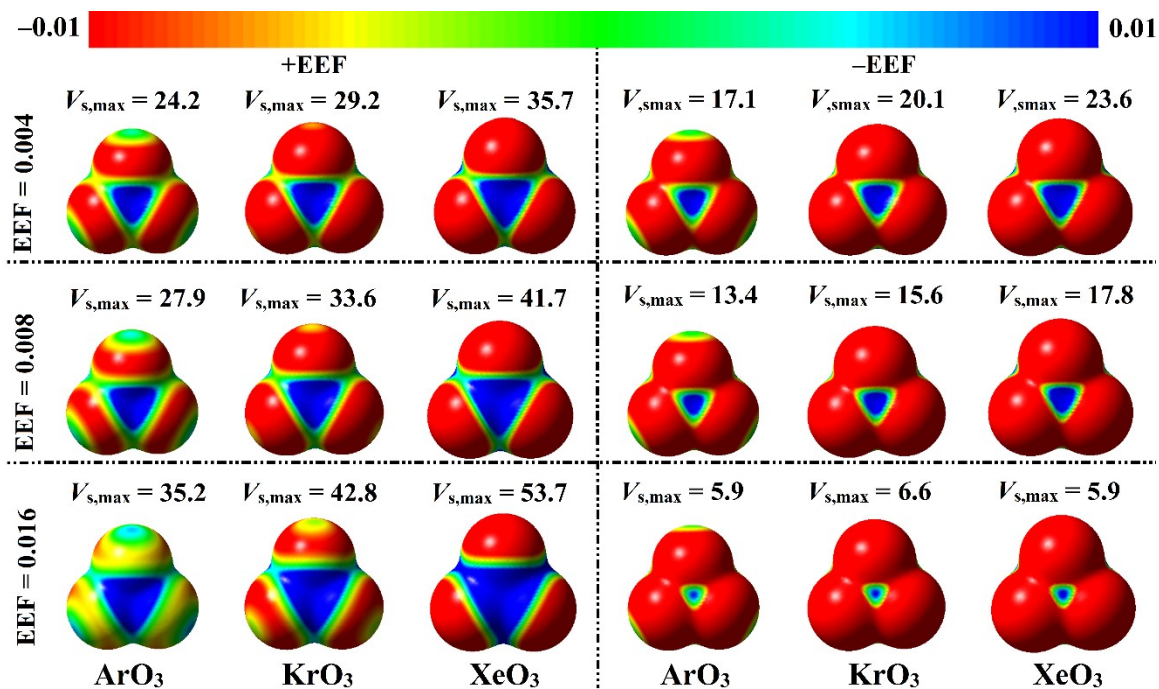

**Figure S2.** MEP maps of the optimized ZO<sub>3</sub> monomers under the positively- and negatively-oriented EEF with magnitudes of 0.004-0.016 au.  $V_{s,max}$  values at the arogen lp-hole site of the optimized ZO<sub>3</sub> monomers are in kcal/mol.

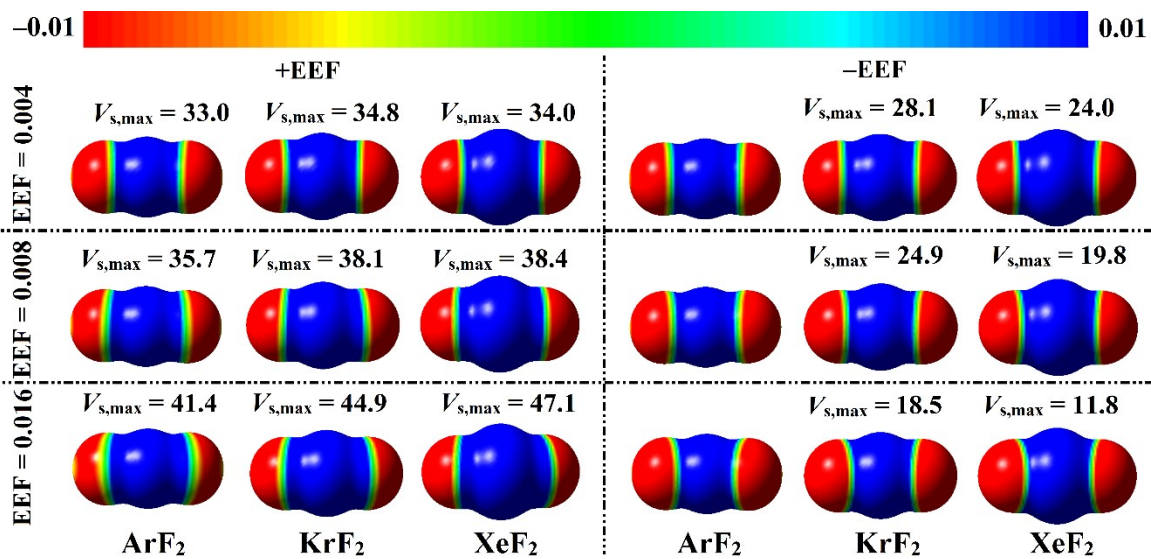

**Figure S3.** MEP maps of the optimized ZF<sub>2</sub> monomers under the positively- and negatively-oriented EEF with magnitudes of 0.004-0.016 au.  $V_{s,max}$  values at the aerogen  $\pi$ -hole site of the optimized ZF<sub>2</sub> monomers are in kcal/mol.

**Cartesian atomic coordinates**

**EEF=0.000 au**

**ArO<sub>3</sub>...NH<sub>3</sub>:**

**σ-Hole Interactions**

**$E_{\text{MP2/aug-cc-pVTZ(PP)}} = -6.56 \text{ kcal/mol}$**

**Cartesian atomic coordinates:**

|    |             |             |            |
|----|-------------|-------------|------------|
| O  | 1.72749800  | 0.83369500  | 0.00188800 |
| O  | 0.87792500  | -1.06455400 | 1.20169300 |
| O  | 1.72972700  | 0.83425500  | 2.39862700 |
| Ar | 0.98866200  | 0.40671800  | 1.20101000 |
| N  | -0.37252500 | 2.91653000  | 1.20024700 |
| H  | -0.90560500 | 3.20820500  | 2.01075800 |
| H  | -0.89691100 | 3.21379900  | 0.38612300 |
| H  | 0.48119300  | 3.46281200  | 1.20678100 |

**lp-Hole Interactions**

**$E_{\text{MP2/aug-cc-pVTZ(PP)}} = -0.30 \text{ kcal/mol}$**

**Cartesian atomic coordinates:**

|    |             |             |             |
|----|-------------|-------------|-------------|
| O  | -1.32863200 | 0.45039700  | -0.00487800 |
| O  | -1.32990100 | -1.63510200 | 1.19920600  |
| O  | -1.32943800 | 0.45042000  | 2.40325600  |
| Ar | -1.80564600 | -0.24456200 | 1.19903400  |
| N  | 1.75766300  | -0.24606000 | 1.20037300  |
| H  | 2.13772400  | 0.69228300  | 1.20057000  |
| H  | 2.13762900  | -0.71539400 | 0.38779300  |
| H  | 2.13690900  | -0.71544000 | 2.01326300  |

**ArF<sub>2</sub>...NH<sub>3</sub>**

**π-Hole Interactions**

**$E_{\text{MP2/aug-cc-pVTZ(PP)}} = -2.76 \text{ kcal/mol}$**

**Cartesian atomic coordinates:**

|    |            |             |             |
|----|------------|-------------|-------------|
| Ar | 0.03105400 | 1.43979100  | 0.36069700  |
| F  | 0.02549400 | 3.29636600  | 0.37077300  |
| F  | 0.02549400 | -0.41678500 | 0.37077300  |
| N  | 1.43503300 | 1.43979100  | -2.48444900 |
| H  | 1.18047800 | 0.62708200  | -3.03235000 |
| H  | 2.44572500 | 1.43979100  | -2.42233400 |
| H  | 1.18047700 | 2.25250000  | -3.03234900 |

## KrO<sub>3</sub>...NH<sub>3</sub>

### σ-Hole Interactions

$$\underline{E_{\text{MP2/aug-cc-pVTZ(PP)}} = -8.87 \text{ kcal/mol}}$$

#### Cartesian atomic coordinates:

|    |            |            |             |
|----|------------|------------|-------------|
| O  | 0.00000000 | 0.00000000 | 0.00000000  |
| O  | 0.00000000 | 0.00000000 | 2.57818845  |
| O  | 2.23311055 | 0.00000000 | 1.28960538  |
| Kr | 0.74545609 | 0.58732873 | 1.28747984  |
| N  | 1.77140315 | 2.48901744 | -0.49106127 |
| H  | 2.57534881 | 3.05186569 | -0.23888581 |
| H  | 1.15816493 | 3.08104883 | -1.03893104 |
| H  | 2.11002053 | 1.76689124 | -1.11739207 |

### lp-Hole Interactions

$$\underline{E_{\text{MP2/aug-cc-pVTZ(PP)}} = -0.92 \text{ kcal/mol}}$$

#### Cartesian atomic coordinates:

|    |             |             |            |
|----|-------------|-------------|------------|
| O  | 0.00000000  | 0.00000000  | 0.00000000 |
| O  | 0.00000000  | 0.00000000  | 2.60523724 |
| O  | 2.25625216  | 0.00000000  | 1.30262700 |
| Kr | 0.75210751  | 0.53659174  | 1.30261417 |
| N  | 0.75267634  | -2.83867824 | 1.30544959 |
| H  | -0.18649459 | -3.21688234 | 1.30650352 |
| H  | 1.22195206  | -3.21511413 | 2.11979728 |
| H  | 1.22206625  | -3.21999881 | 0.49343683 |

## KrF<sub>2</sub>...NH<sub>3</sub>

### π-Hole Interactions

$$\underline{E_{\text{MP2/aug-cc-pVTZ(PP)}} = -3.01 \text{ kcal/mol}}$$

#### Cartesian atomic coordinates:

|    |            |             |            |
|----|------------|-------------|------------|
| F  | 0.00000000 | 0.00000000  | 0.00000000 |
| F  | 0.00000000 | 0.00000000  | 3.76175515 |
| Kr | 0.00977963 | 0.00000000  | 1.88086136 |
| N  | 3.27364636 | 0.19044078  | 1.88166251 |
| H  | 3.71998013 | -0.71858855 | 1.88249915 |
| H  | 3.62275026 | 0.68252821  | 2.69509073 |
| H  | 3.62602449 | 0.68264904  | 1.06972445 |

## XeO<sub>3</sub>⋯NH<sub>3</sub>

### σ-Hole Interactions

$$\underline{E_{\text{MP2/aug-cc-pVTZ(PP)}} = -11.65 \text{ kcal/mol}}$$

#### Cartesian atomic coordinates:

|    |            |            |            |
|----|------------|------------|------------|
| O  | 0.00000000 | 0.00000000 | 0.00000000 |
| O  | 0.00000000 | 0.00000000 | 2.79037558 |
| O  | 2.42196118 | 0.00000000 | 1.38559579 |
| Xe | 0.80985655 | 0.69839902 | 1.39655599 |
| N  | 1.98072863 | 2.20070988 | 3.41366349 |
| H  | 2.79648974 | 2.77373681 | 3.23021521 |
| H  | 2.30816180 | 1.36865392 | 3.89367206 |
| H  | 1.39405574 | 2.70574641 | 4.06804119 |

### lp-Hole Interactions

$$\underline{E_{\text{MP2/aug-cc-pVTZ(PP)}} = -3.50 \text{ kcal/mol}}$$

#### Cartesian atomic coordinates:

|    |             |             |            |
|----|-------------|-------------|------------|
| O  | 0.00000000  | 0.00000000  | 0.00000000 |
| O  | 0.00000000  | 0.00000000  | 2.87383705 |
| O  | 2.48857202  | 0.00000000  | 1.43694319 |
| Xe | 0.82943870  | 0.57787825  | 1.43690519 |
| N  | 0.82637494  | -2.43445826 | 1.43714778 |
| H  | -0.11550408 | -2.80653659 | 1.43731447 |
| H  | 1.29652407  | -2.80784869 | 2.25269768 |
| H  | 1.29662888  | -2.80877471 | 0.62208324 |

## XeF<sub>2</sub>⋯NH<sub>3</sub>

### π-Hole Interactions

$$\underline{E_{\text{MP2/aug-cc-pVTZ(PP)}} = -2.74 \text{ kcal/mol}}$$

#### Cartesian atomic coordinates:

|    |            |             |            |
|----|------------|-------------|------------|
| F  | 0.00000000 | 0.00000000  | 0.00000000 |
| F  | 0.00000000 | 0.00000000  | 3.98438202 |
| Xe | 0.01038501 | 0.00000000  | 1.99217404 |
| N  | 3.47922734 | 0.28073207  | 1.99193812 |
| H  | 3.95182377 | -0.61507121 | 1.99277119 |
| H  | 3.81624419 | 0.78269124  | 2.80459390 |
| H  | 3.81896154 | 0.78259070  | 1.18034790 |

## ArO<sub>3</sub>...NCH

### σ-Hole Interactions

$$\underline{E_{\text{MP2/aug-cc-pVTZ(PP)}} = -5.10 \text{ kcal/mol}}$$

#### Cartesian atomic coordinates:

|    |             |             |            |
|----|-------------|-------------|------------|
| O  | 2.00003000  | 0.12714000  | 0.00101600 |
| O  | 0.92954100  | -1.65728600 | 1.19893300 |
| O  | 2.00134600  | 0.12497500  | 2.39889400 |
| Ar | 1.21910800  | -0.21167300 | 1.20009000 |
| C  | -0.52917900 | 3.41265200  | 1.20032300 |
| H  | -0.82279200 | 4.43699500  | 1.19908300 |
| N  | -0.20546500 | 2.29292900  | 1.20177200 |

### lp-Hole Interactions

$$\underline{E_{\text{MP2/aug-cc-pVTZ(PP)}} = -0.17 \text{ kcal/mol}}$$

#### Cartesian atomic coordinates:

|    |            |             |             |
|----|------------|-------------|-------------|
| O  | 1.00090600 | 0.44851700  | -0.00354500 |
| O  | 1.00088300 | -1.63457000 | 1.19912500  |
| O  | 1.00596400 | 0.44853300  | 2.40182500  |
| Ar | 0.52265200 | -0.24524000 | 1.20016500  |
| C  | 5.21440500 | -0.24521300 | 1.20030400  |
| H  | 6.27940900 | -0.24463500 | 1.20132600  |
| N  | 4.04700200 | -0.24582500 | 1.19922100  |

## ArF<sub>2</sub>...NCH

### π-Hole Interactions

$$\underline{E_{\text{MP2/aug-cc-pVTZ(PP)}} = -2.28 \text{ kcal/mol}}$$

#### Cartesian atomic coordinates:

|    |            |             |             |
|----|------------|-------------|-------------|
| Ar | 0.12521300 | 1.43979700  | 0.30106500  |
| F  | 0.12190800 | 3.29754100  | 0.31280500  |
| F  | 0.12191600 | -0.41795300 | 0.31277900  |
| C  | 1.28015500 | 1.43978600  | -3.82875400 |
| H  | 1.56701800 | 1.43978900  | -4.85451500 |
| N  | 0.96594600 | 1.43978500  | -2.70521100 |

## KrO<sub>3</sub>...NCH

### σ-Hole Interactions

$$\underline{E_{\text{MP2/aug-cc-pVTZ(PP)}} = -6.42 \text{ kcal/mol}}$$

#### Cartesian atomic coordinates:

|    |            |            |             |
|----|------------|------------|-------------|
| O  | 0.00000000 | 0.00000000 | 0.00000000  |
| O  | 0.00000000 | 0.00000000 | 2.58208089  |
| O  | 2.23490657 | 0.00000000 | 1.28883756  |
| Kr | 0.74580035 | 0.57752446 | 1.28887301  |
| C  | 2.14398782 | 3.43969651 | -1.13961293 |
| H  | 2.59262838 | 4.00963763 | -1.92049610 |
| N  | 1.65450932 | 2.81250186 | -0.28843298 |

### lp-Hole Interactions

$$\underline{E_{\text{MP2/aug-cc-pVTZ(PP)}} = -0.36 \text{ kcal/mol}}$$

#### Cartesian atomic coordinates:

|    |            |             |            |
|----|------------|-------------|------------|
| O  | 0.00000000 | 0.00000000  | 0.00000000 |
| O  | 0.00000000 | 0.00000000  | 2.59773172 |
| O  | 2.24980290 | 0.00000000  | 1.29887009 |
| Kr | 0.74998909 | 0.54624601  | 1.29886520 |
| C  | 0.76021092 | -4.04096162 | 1.29918475 |
| H  | 0.76328687 | -5.10600448 | 1.29937640 |
| N  | 0.75688279 | -2.87365806 | 1.29897675 |

## KrF<sub>2</sub>...NCH

### π-Hole Interactions

$$\underline{E_{\text{MP2/aug-cc-pVTZ(PP)}} = -2.48 \text{ kcal/mol}}$$

#### Cartesian atomic coordinates:

|    |            |             |            |
|----|------------|-------------|------------|
| F  | 0.00000000 | 0.00000000  | 0.00000000 |
| F  | 0.00000000 | 0.00000000  | 3.76110200 |
| Kr | 0.01132893 | 0.00000000  | 1.88055100 |
| C  | 4.40158227 | -0.00076980 | 1.88055217 |
| H  | 5.46688260 | -0.00095611 | 1.88055245 |
| N  | 3.23513113 | -0.00056580 | 1.88055186 |



## XeO<sub>3</sub>...NCH

### σ-Hole Interactions

$$\underline{E_{\text{MP2/aug-cc-pVTZ(PP)}} = -7.67 \text{ kcal/mol}}$$

#### Cartesian atomic coordinates:

|    |            |            |            |
|----|------------|------------|------------|
| O  | 0.00000000 | 0.00000000 | 0.00000000 |
| O  | 0.00000000 | 0.00000000 | 2.79970160 |
| O  | 2.42510204 | 0.00000000 | 1.39899199 |
| Xe | 0.80954714 | 0.68252173 | 1.40160836 |
| C  | 2.48685228 | 2.90745402 | 4.30250745 |
| H  | 2.99994905 | 3.20123547 | 5.18942948 |
| N  | 1.92717104 | 2.58073377 | 3.33480067 |

### lp-Hole Interactions

$$\underline{E_{\text{MP2/aug-cc-pVTZ(PP)}} = -0.93 \text{ kcal/mol}}$$

#### Cartesian atomic coordinates:

|    |            |             |            |
|----|------------|-------------|------------|
| O  | 0.00000000 | 0.00000000  | 0.00000000 |
| O  | 0.00000000 | 0.00000000  | 2.83741985 |
| O  | 2.45764008 | 0.00000000  | 1.41872904 |
| Xe | 0.81933549 | 0.62474572  | 1.41870905 |
| C  | 0.83120610 | -3.84612169 | 1.41914430 |
| H  | 0.83505354 | -4.91110653 | 1.41941922 |
| N  | 0.82703413 | -2.67917932 | 1.41886508 |

## XeF<sub>2</sub>...NCH

### π-Hole Interactions

$$\underline{E_{\text{MP2/aug-cc-pVTZ(PP)}} = -2.33 \text{ kcal/mol}}$$

#### Cartesian atomic coordinates:

|    |            |             |            |
|----|------------|-------------|------------|
| F  | 0.00000000 | 0.00000000  | 0.00000000 |
| F  | 0.00000000 | 0.00000000  | 3.98277000 |
| Xe | 0.01298594 | 0.00000000  | 1.99138325 |
| C  | 4.61890242 | -0.04444053 | 1.99149266 |
| H  | 5.68416810 | -0.05472943 | 1.99151387 |
| N  | 3.45243697 | -0.03317704 | 1.99147152 |

EEF=0.004 au

ArO<sub>3</sub>...NH<sub>3</sub>:

$\sigma$ -Hole Interactions

$E_{\text{MP2/aug-cc-pVTZ(PP)}} = -7.23 \text{ kcal/mol}$

Cartesian atomic coordinates:

|    |             |             |             |
|----|-------------|-------------|-------------|
| Ar | 0.00000000  | 0.00000000  | 0.00000000  |
| O  | 0.00000000  | 0.00000000  | 1.48259500  |
| O  | 1.39261300  | 0.00000000  | -0.46764000 |
| O  | -0.67309800 | -1.21917000 | -0.46760400 |
| N  | -0.71649500 | 1.21522100  | -2.45584100 |
| H  | -1.20758100 | 0.45801200  | -2.91847600 |
| H  | 0.18380300  | 1.28342400  | -2.91775000 |
| H  | -1.21869800 | 2.06200800  | -2.69624700 |

lp-Hole Interactions

$E_{\text{MP2/aug-cc-pVTZ(PP)}} = -0.57 \text{ kcal/mol}$

Cartesian atomic coordinates:

|    |             |             |             |
|----|-------------|-------------|-------------|
| N  | 0.00000000  | 0.00000000  | 0.00000000  |
| Ar | 0.00000000  | 0.00000000  | 3.51413400  |
| O  | 1.39255800  | 0.00000000  | 3.04533800  |
| O  | -0.69588400 | 1.20470000  | 3.04158700  |
| O  | -0.69493300 | -1.20628500 | 3.04388700  |
| H  | 0.44957800  | 0.81549000  | -0.39940900 |
| H  | -0.93562000 | -0.02167700 | -0.38833900 |
| H  | 0.48213000  | -0.80273200 | -0.38708700 |

ArF<sub>2</sub>...NH<sub>3</sub>

$\pi$ -Hole Interactions

$E_{\text{MP2/aug-cc-pVTZ(PP)}} = -3.14 \text{ kcal/mol}$

Cartesian atomic coordinates:

|    |             |             |             |
|----|-------------|-------------|-------------|
| Ar | 0.00000000  | 0.00000000  | 0.00000000  |
| F  | 1.85692000  | 0.00000000  | 0.03395200  |
| F  | -1.85684600 | -0.00058400 | 0.03437100  |
| N  | -0.01840500 | 0.01661000  | -3.15864900 |
| H  | -0.02353400 | 0.95040100  | -3.55217300 |
| H  | -0.82942700 | -0.45088600 | -3.54718900 |
| H  | 0.78961900  | -0.44669800 | -3.55825100 |

## KrO<sub>3</sub>...NH<sub>3</sub>

### σ-Hole Interactions

$$\underline{E_{\text{MP2/aug-cc-pVTZ(PP)}} = -10.08 \text{ kcal/mol}}$$

#### Cartesian atomic coordinates:

|    |             |             |             |
|----|-------------|-------------|-------------|
| Kr | 0.00000000  | 0.00000000  | 0.00000000  |
| O  | 0.00000000  | 0.00000000  | 1.60889400  |
| O  | 1.53188600  | 0.00000000  | -0.45292700 |
| O  | -0.64731600 | 1.38841500  | -0.45290600 |
| N  | -0.50128200 | -0.78770000 | -2.60238300 |
| H  | -1.00427800 | -1.56804300 | -3.00940200 |
| H  | 0.43867400  | -0.82541200 | -2.98233900 |
| H  | -0.92347200 | 0.05276300  | -2.98278300 |

### lp-Hole Interactions

$$\underline{E_{\text{MP2/aug-cc-pVTZ(PP)}} = -1.47 \text{ kcal/mol}}$$

#### Cartesian atomic coordinates:

|    |             |             |             |
|----|-------------|-------------|-------------|
| N  | 0.00000000  | 0.00000000  | 0.00000000  |
| Kr | 0.00000000  | 0.00000000  | 3.31408500  |
| O  | 1.51128700  | 0.00000000  | 2.79896100  |
| O  | -0.75591600 | 1.29678900  | 2.76742800  |
| O  | -0.74663400 | -1.31514100 | 2.80219800  |
| H  | 0.91763300  | 0.01481100  | -0.42959600 |
| H  | -0.46330500 | 0.85200600  | -0.29366800 |
| H  | -0.50424700 | -0.76163400 | -0.43871400 |

## KrF<sub>2</sub>...NH<sub>3</sub>

### π-Hole Interactions

$$\underline{E_{\text{MP2/aug-cc-pVTZ(PP)}} = -3.49 \text{ kcal/mol}}$$

#### Cartesian atomic coordinates:

|    |             |             |             |
|----|-------------|-------------|-------------|
| Kr | 0.00000000  | 0.00000000  | 0.00000000  |
| F  | 1.88114400  | 0.00000000  | 0.02900800  |
| F  | -1.88119400 | -0.00079400 | 0.03532100  |
| N  | 0.00467200  | 0.00378200  | -3.24673200 |
| H  | 0.00706600  | 0.93407700  | -3.64892300 |
| H  | -0.80635800 | -0.46268200 | -3.63652300 |
| H  | 0.81265700  | -0.46718700 | -3.63735200 |

### XeO<sub>3</sub>...NH<sub>3</sub>

#### $\sigma$ -Hole Interactions

$$\underline{E_{\text{MP2/aug-cc-pVTZ(PP)}} = -13.78 \text{ kcal/mol}}$$

#### Cartesian atomic coordinates:

|    |             |             |             |
|----|-------------|-------------|-------------|
| Xe | 0.00000000  | 0.00000000  | 0.00000000  |
| O  | 0.00000000  | 0.00000000  | 1.76529500  |
| O  | 1.70475200  | 0.00000000  | -0.42041400 |
| O  | -0.61119600 | -1.59138200 | -0.42044000 |
| N  | -0.21532900 | 0.31722300  | -2.70097300 |
| H  | -0.69498900 | 1.01312200  | -3.26168800 |
| H  | -0.57774200 | -0.58957200 | -2.97867200 |
| H  | 0.76165900  | 0.33536600  | -2.97649400 |

#### lp-Hole Interactions

$$\underline{E_{\text{MP2/aug-cc-pVTZ(PP)}} = -6.81 \text{ kcal/mol}}$$

#### Cartesian atomic coordinates:

|    |             |             |             |
|----|-------------|-------------|-------------|
| Xe | 0.00000000  | 0.00000000  | 0.00000000  |
| O  | 1.69215400  | 0.00000000  | -0.48773900 |
| O  | -0.82259700 | 1.47429800  | -0.50114500 |
| O  | -0.84154100 | -1.44064100 | -0.56327000 |
| N  | 0.04801600  | 0.05691300  | -2.77598600 |
| H  | 0.73342700  | -0.58793800 | -3.15239200 |
| H  | 0.27700800  | 0.97861500  | -3.12996300 |
| H  | -0.85114700 | -0.19981200 | -3.16699600 |

### XeF<sub>2</sub>...NH<sub>3</sub>

#### $\pi$ -Hole Interactions

$$\underline{E_{\text{MP2/aug-cc-pVTZ(PP)}} = -3.32 \text{ kcal/mol}}$$

#### Cartesian atomic coordinates:

|    |             |             |             |
|----|-------------|-------------|-------------|
| Xe | 0.00000000  | 0.00000000  | 0.00000000  |
| F  | 1.99285400  | 0.00000000  | 0.03306600  |
| F  | -1.99263700 | -0.00108200 | 0.04783100  |
| N  | 0.01319000  | 0.00544000  | -3.44253000 |
| H  | 0.00036000  | 0.93253700  | -3.85213300 |
| H  | -0.78190500 | -0.48140300 | -3.84049800 |
| H  | 0.83579500  | -0.45035700 | -3.82089600 |

## ArO<sub>3</sub>...NCH

### σ-Hole Interactions

$$\underline{E_{\text{MP2/aug-cc-pVTZ(PP)}} = -5.69 \text{ kcal/mol}}$$

#### Cartesian atomic coordinates:

|    |             |             |             |
|----|-------------|-------------|-------------|
| Ar | 0.00000000  | 0.00000000  | 0.00000000  |
| O  | 0.00000000  | 0.00000000  | 1.48150300  |
| O  | 1.38963300  | 0.00000000  | -0.47163900 |
| O  | -0.68092700 | 1.21133500  | -0.47171100 |
| C  | -0.88778400 | -1.51810700 | -3.51777200 |
| H  | -0.96615400 | -1.65250100 | -4.57343099 |
| N  | -0.79957700 | -1.36665600 | -2.36553299 |

### lp-Hole Interactions

$$\underline{E_{\text{MP2/aug-cc-pVTZ(PP)}} = -0.42 \text{ kcal/mol}}$$

#### Cartesian atomic coordinates:

|    |             |             |             |
|----|-------------|-------------|-------------|
| N  | 0.00000000  | 0.00000000  | 0.00000000  |
| Ar | 0.00000000  | 0.00000000  | 3.47206600  |
| O  | 1.38992700  | 0.00000000  | 2.99667000  |
| O  | -0.69531300 | 1.20421100  | 2.99852300  |
| O  | -0.69564200 | -1.20367300 | 2.99749700  |
| C  | 0.00182000  | -0.00127700 | -1.16711400 |
| H  | 0.00284300  | -0.00284700 | -2.23355300 |

## ArF<sub>2</sub>...NCH

### π-Hole Interactions

$$\underline{E_{\text{MP2/aug-cc-pVTZ(PP)}} = -2.67 \text{ kcal/mol}}$$

#### Cartesian atomic coordinates:

|    |             |            |             |
|----|-------------|------------|-------------|
| Ar | 0.00000000  | 0.00000000 | 0.00000000  |
| F  | 1.85759600  | 0.00000000 | 0.03895200  |
| F  | -1.85772700 | 0.00000000 | 0.03074400  |
| C  | 0.00425500  | 0.00000000 | -4.26671000 |
| H  | 0.00397200  | 0.00000000 | -5.33335200 |
| N  | 0.00425200  | 0.00000000 | -3.10042500 |

## KrO<sub>3</sub>...NCH

### σ-Hole Interactions

$$\underline{E_{\text{MP2/aug-cc-pVTZ(PP)}} = -7.36 \text{ kcal/mol}}$$

#### Cartesian atomic coordinates:

|    |             |             |             |
|----|-------------|-------------|-------------|
| Kr | 0.00000000  | 0.00000000  | 0.00000000  |
| O  | 0.00000000  | 0.00000000  | 1.60717900  |
| O  | 1.52521900  | 0.00000000  | -0.46594600 |
| O  | -0.66282800 | 1.37355500  | -0.46631800 |
| C  | -0.72386700 | -1.12649100 | -3.71055200 |
| H  | -0.77103100 | -1.18343900 | -4.77541800 |
| N  | -0.67062400 | -1.05819900 | -2.54885000 |

### lp-Hole Interactions

$$\underline{E_{\text{MP2/aug-cc-pVTZ(PP)}} = -0.76 \text{ kcal/mol}}$$

#### Cartesian atomic coordinates:

|    |             |             |             |
|----|-------------|-------------|-------------|
| N  | 0.00000000  | 0.00000000  | 0.00000000  |
| Kr | 0.00000000  | 0.00000000  | 3.36099700  |
| O  | 1.50219100  | 0.00000000  | 2.82209600  |
| O  | -0.75248800 | 1.30221900  | 2.82700400  |
| O  | -0.75305200 | -1.30167200 | 2.82656300  |
| C  | 0.00329900  | 0.00591100  | -1.16693100 |
| H  | 0.00590600  | 0.01061900  | -2.23341200 |

## KrF<sub>2</sub>...NCH

### π-Hole Interactions

$$\underline{E_{\text{MP2/aug-cc-pVTZ(PP)}} = -2.96 \text{ kcal/mol}}$$

#### Cartesian atomic coordinates:

|    |             |            |             |
|----|-------------|------------|-------------|
| Kr | 0.00000000  | 0.00000000 | 0.00000000  |
| F  | 1.88061600  | 0.00000000 | 0.03135100  |
| F  | -1.88067000 | 0.00000000 | 0.03390500  |
| C  | -0.00114300 | 0.00000000 | -4.36454300 |
| H  | -0.00451700 | 0.00000000 | -5.43137100 |
| N  | 0.00298000  | 0.00000000 | -3.19832800 |

## XeO<sub>3</sub>...NCH

### $\sigma$ -Hole Interactions

$$\underline{E_{\text{MP2/aug-cc-pVTZ(PP)}} = -9.05 \text{ kcal/mol}}$$

#### Cartesian atomic coordinates:

|    |             |             |             |
|----|-------------|-------------|-------------|
| Xe | 0.00000000  | 0.00000000  | 0.00000000  |
| O  | 0.00000000  | 0.00000000  | 1.76249800  |
| O  | 1.69381400  | 0.00000000  | -0.44736300 |
| O  | -0.63126600 | -1.57172800 | -0.44755100 |
| C  | -0.43025600 | 0.61628700  | -3.93016000 |
| H  | -0.40239300 | 0.56406100  | -4.99633000 |
| N  | -0.45875500 | 0.66818500  | -2.76728000 |

### lp-Hole Interactions

$$\underline{E_{\text{MP2/aug-cc-pVTZ(PP)}} = -1.73 \text{ kcal/mol}}$$

#### Cartesian atomic coordinates:

|    |             |             |             |
|----|-------------|-------------|-------------|
| N  | 0.00000000  | 0.00000000  | 0.00000000  |
| Xe | 0.00000000  | 0.00000000  | 3.20780000  |
| O  | 1.64681300  | 0.00000000  | 2.60556700  |
| O  | -0.82294700 | 1.42705900  | 2.60707400  |
| O  | -0.82397500 | -1.42558800 | 2.60501900  |
| C  | 0.00633000  | 0.00034600  | -1.16640300 |
| H  | 0.01205400  | -0.00139500 | -2.23287500 |

## XeF<sub>2</sub>...NCH

### $\pi$ -Hole Interactions

$$\underline{E_{\text{MP2/aug-cc-pVTZ(PP)}} = -2.90 \text{ kcal/mol}}$$

#### Cartesian atomic coordinates:

|    |             |            |             |
|----|-------------|------------|-------------|
| Xe | 0.00000000  | 0.00000000 | 0.00000000  |
| F  | 1.99181600  | 0.00000000 | 0.04414300  |
| F  | -1.99154000 | 0.00000000 | 0.04070000  |
| C  | -0.00899200 | 0.00000000 | -4.56337600 |
| H  | 0.00200600  | 0.00000000 | -5.63021300 |
| N  | -0.02128800 | 0.00000000 | -3.39714800 |

**EEF=0.008 au**

**ArO<sub>3</sub>⋯NH<sub>3</sub>:**

**σ-Hole Interactions**

**$E_{\text{MP2/aug-cc-pVTZ(PP)}} = -7.94 \text{ kcal/mol}$**

**Cartesian atomic coordinates:**

|    |             |             |             |
|----|-------------|-------------|-------------|
| Ar | 0.00000000  | 0.00000000  | 0.00000000  |
| O  | 0.00000000  | 0.00000000  | 1.49109000  |
| O  | 1.39434200  | 0.00000000  | -0.45358600 |
| O  | -0.67233900 | -1.22085900 | -0.45456000 |
| N  | -0.68575400 | 1.11916000  | -2.48355900 |
| H  | -1.59182400 | 0.83652900  | -2.84218300 |
| H  | -0.00966200 | 0.58562700  | -3.02133000 |
| H  | -0.56429800 | 2.08045400  | -2.78372900 |

**lp-Hole Interactions**

**$E_{\text{MP2/aug-cc-pVTZ(PP)}} = -0.89 \text{ kcal/mol}$**

**Cartesian atomic coordinates:**

|    |             |             |             |
|----|-------------|-------------|-------------|
| N  | 0.00000000  | 0.00000000  | 0.00000000  |
| Ar | 0.00000000  | 0.00000000  | 3.46899500  |
| O  | 1.39390900  | 0.00000000  | 3.00489100  |
| O  | -0.69620400 | 1.20780500  | 3.00536400  |
| O  | -0.69710900 | -1.20618800 | 3.00255300  |
| H  | 0.45481700  | 0.80952500  | -0.40757200 |
| H  | -0.93176100 | -0.01336700 | -0.39991800 |
| H  | 0.47424400  | -0.80273100 | -0.39875900 |

**ArF<sub>2</sub>⋯NH<sub>3</sub>**

**π-Hole Interactions**

**$E_{\text{MP2/aug-cc-pVTZ(PP)}} = -3.55 \text{ kcal/mol}$**

**Cartesian atomic coordinates:**

|    |             |             |             |
|----|-------------|-------------|-------------|
| Ar | 0.00000000  | 0.00000000  | 0.00000000  |
| F  | 1.85629800  | 0.00000000  | 0.05559200  |
| F  | -1.85625900 | -0.00124400 | 0.05604900  |
| N  | -0.01157500 | 0.02231300  | -3.14276500 |
| H  | -0.01406700 | 0.95305700  | -3.54570000 |
| H  | -0.82023300 | -0.44133400 | -3.54262500 |
| H  | 0.79280800  | -0.44088400 | -3.55166800 |



## KrO<sub>3</sub>...NH<sub>3</sub>

### $\sigma$ -Hole Interactions

$$\underline{E_{\text{MP2/aug-cc-pVTZ(PP)}} = -11.40 \text{ kcal/mol}}$$

#### Cartesian atomic coordinates:

|    |             |             |             |
|----|-------------|-------------|-------------|
| Kr | 0.00000000  | 0.00000000  | 0.00000000  |
| O  | 0.00000000  | 0.00000000  | 1.61692200  |
| O  | 1.53644100  | 0.00000000  | -0.43027100 |
| O  | -0.64486300 | 1.39457000  | -0.43026000 |
| N  | -0.46267200 | -0.72399400 | -2.58721300 |
| H  | -0.96606400 | -1.50792300 | -2.98909000 |
| H  | 0.47178400  | -0.76478200 | -2.98232500 |
| H  | -0.88860600 | 0.10874200  | -2.98233600 |

### lp-Hole Interactions

$$\underline{E_{\text{MP2/aug-cc-pVTZ(PP)}} = -2.05 \text{ kcal/mol}}$$

#### Cartesian atomic coordinates:

|    |             |             |             |
|----|-------------|-------------|-------------|
| N  | 0.00000000  | 0.00000000  | 0.00000000  |
| Kr | 0.00000000  | 0.00000000  | 3.24248200  |
| O  | 1.51141100  | 0.00000000  | 2.72649600  |
| O  | -0.75586200 | 1.31351500  | 2.73865500  |
| O  | -0.75986500 | -1.30683200 | 2.72716700  |
| H  | 0.54618600  | -0.76521300 | -0.38033700 |
| H  | 0.38953300  | 0.84042000  | -0.41296200 |
| H  | -0.92283500 | -0.09812400 | -0.40905300 |

## KrF<sub>2</sub>...NH<sub>3</sub>

### $\pi$ -Hole Interactions

$$\underline{E_{\text{MP2/aug-cc-pVTZ(PP)}} = -4.01 \text{ kcal/mol}}$$

#### Cartesian atomic coordinates:

|    |             |             |             |
|----|-------------|-------------|-------------|
| Kr | 0.00000000  | 0.00000000  | 0.00000000  |
| F  | 1.88132600  | 0.00000000  | 0.05075000  |
| F  | -1.88123400 | -0.00083300 | 0.05973700  |
| N  | 0.00116500  | 0.00516300  | -3.22561600 |
| H  | -0.00416600 | 0.93261700  | -3.63627100 |
| H  | -0.80164800 | -0.46656100 | -3.62796400 |
| H  | 0.81145200  | -0.45609700 | -3.62510300 |

### XeO<sub>3</sub>...NH<sub>3</sub>

#### $\sigma$ -Hole Interactions

$$\underline{E_{\text{MP2/aug-cc-pVTZ(PP)}} = -15.98 \text{ kcal/mol}}$$

#### Cartesian atomic coordinates:

|    |             |             |             |
|----|-------------|-------------|-------------|
| Xe | 0.00000000  | 0.00000000  | 0.00000000  |
| O  | 0.00000000  | 0.00000000  | 1.77319700  |
| O  | 1.71200800  | 0.00000000  | -0.38456100 |
| O  | -0.61040100 | -1.59938600 | -0.38487500 |
| N  | -0.17108700 | 0.25550000  | -2.64673700 |
| H  | 0.28084500  | 1.04895700  | -3.09135500 |
| H  | -1.07241800 | 0.13955100  | -3.10025700 |
| H  | 0.37919500  | -0.56088200 | -2.89944900 |

#### lp-Hole Interactions

$$\underline{E_{\text{MP2/aug-cc-pVTZ(PP)}} = -14.17 \text{ kcal/mol}}$$

#### Cartesian atomic coordinates:

|    |             |             |             |
|----|-------------|-------------|-------------|
| Xe | 0.00000000  | 0.00000000  | 0.00000000  |
| O  | 1.71318100  | 0.00000000  | -0.44690200 |
| O  | -0.85303700 | 1.49926600  | -0.40039300 |
| O  | -0.87077400 | -1.47262300 | -0.45560200 |
| N  | -0.01792600 | 0.04614100  | -2.49264000 |
| H  | 0.44493900  | -0.77383100 | -2.87070200 |
| H  | 0.46330900  | 0.87043500  | -2.83670600 |
| H  | -0.97017300 | 0.06400200  | -2.84241900 |

### XeF<sub>2</sub>...NH<sub>3</sub>

#### $\pi$ -Hole Interactions

$$\underline{E_{\text{MP2/aug-cc-pVTZ(PP)}} = -3.97 \text{ kcal/mol}}$$

#### Cartesian atomic coordinates:

|    |             |             |             |
|----|-------------|-------------|-------------|
| Xe | 0.00000000  | 0.00000000  | 0.00000000  |
| F  | 1.99284500  | 0.00000000  | 0.05980600  |
| F  | -1.99258700 | -0.00096400 | 0.07827300  |
| N  | 0.00814000  | 0.00829300  | -3.41222700 |
| H  | 0.00204100  | 0.93354100  | -3.82828200 |
| H  | -0.79008600 | -0.46808800 | -3.81875300 |
| H  | 0.82191200  | -0.45201700 | -3.80618700 |

## ArO<sub>3</sub>...NCH

### σ-Hole Interactions

$$\underline{E_{\text{MP2/aug-cc-pVTZ(PP)}} = -6.39 \text{ kcal/mol}}$$

#### Cartesian atomic coordinates:

|    |             |             |             |
|----|-------------|-------------|-------------|
| Ar | 0.00000000  | 0.00000000  | 0.00000000  |
| O  | 0.00000000  | 0.00000000  | 1.48961700  |
| O  | 1.39072700  | 0.00000000  | -0.45928100 |
| O  | -0.68065100 | 1.21273000  | -0.45939800 |
| C  | -0.79062900 | -1.36092500 | -3.57509900 |
| H  | -0.83907500 | -1.44746100 | -4.63934900 |
| N  | -0.73581600 | -1.26145800 | -2.41517400 |

### lp-Hole Interactions

$$\underline{E_{\text{MP2/aug-cc-pVTZ(PP)}} = -0.72 \text{ kcal/mol}}$$

#### Cartesian atomic coordinates:

|    |             |             |             |
|----|-------------|-------------|-------------|
| N  | 0.00000000  | 0.00000000  | 0.00000000  |
| Ar | 0.00000000  | 0.00000000  | 3.42404800  |
| O  | 1.39160300  | 0.00000000  | 2.95457000  |
| O  | -0.69741500 | 1.20286100  | 2.95111400  |
| O  | -0.69462000 | -1.20783600 | 2.95946400  |
| C  | 0.00108300  | 0.00025200  | -1.16694900 |
| H  | 0.00176600  | -0.00098700 | -2.23500600 |

## ArF<sub>2</sub>...NCH

### π-Hole Interactions

$$\underline{E_{\text{MP2/aug-cc-pVTZ(PP)}} = -3.11 \text{ kcal/mol}}$$

#### Cartesian atomic coordinates:

|    |             |            |             |
|----|-------------|------------|-------------|
| Ar | 0.00000000  | 0.00000000 | 0.00000000  |
| F  | 1.85725900  | 0.00000000 | 0.06089800  |
| F  | -1.85745800 | 0.00000000 | 0.05279800  |
| C  | 0.00501200  | 0.00000000 | -4.24542300 |
| H  | 0.00560600  | 0.00000000 | -5.31374500 |
| N  | 0.00406900  | 0.00000000 | -3.07926900 |

## KrO<sub>3</sub>...NCH

### σ-Hole Interactions

$$\underline{E_{\text{MP2/aug-cc-pVTZ(PP)}} = -8.45 \text{ kcal/mol}}$$

#### Cartesian atomic coordinates:

|    |             |             |             |
|----|-------------|-------------|-------------|
| Kr | 0.00000000  | 0.00000000  | 0.00000000  |
| O  | 0.00000000  | 0.00000000  | 1.61450300  |
| O  | 1.52854400  | 0.00000000  | -0.44711600 |
| O  | -0.66048900 | 1.37845700  | -0.44720500 |
| C  | -0.64734900 | -1.02906400 | -3.72093900 |
| H  | -0.67605900 | -1.07519600 | -4.78891800 |
| N  | -0.61350700 | -0.97499800 | -2.55780900 |

### lp-Hole Interactions

$$\underline{E_{\text{MP2/aug-cc-pVTZ(PP)}} = -1.24 \text{ kcal/mol}}$$

#### Cartesian atomic coordinates:

|    |             |             |             |
|----|-------------|-------------|-------------|
| N  | 0.00000000  | 0.00000000  | 0.00000000  |
| Kr | 0.00000000  | 0.00000000  | 3.30351400  |
| O  | 1.50747100  | 0.00000000  | 2.77989900  |
| O  | -0.75287100 | 1.30511400  | 2.77769400  |
| O  | -0.75302300 | -1.30510900 | 2.77796000  |
| C  | -0.00518300 | 0.00567800  | -1.16670800 |
| H  | -0.01030500 | 0.00903400  | -2.23482700 |

## KrF<sub>2</sub>...NCH

### π-Hole Interactions

$$\underline{E_{\text{MP2/aug-cc-pVTZ(PP)}} = -3.50 \text{ kcal/mol}}$$

#### Cartesian atomic coordinates:

|    |             |            |             |
|----|-------------|------------|-------------|
| Kr | 0.00000000  | 0.00000000 | 0.00000000  |
| F  | 1.88080200  | 0.00000000 | 0.05561900  |
| F  | -1.88083100 | 0.00000000 | 0.05932200  |
| C  | -0.00026100 | 0.00000000 | -4.33227500 |
| H  | -0.00365400 | 0.00000000 | -5.40082700 |
| N  | 0.00323700  | 0.00000000 | -3.16618400 |

## XeO<sub>3</sub>...NCH

### σ-Hole Interactions

$$\underline{E_{\text{MP2/aug-cc-pVTZ(PP)}} = -10.67 \text{ kcal/mol}}$$

#### Cartesian atomic coordinates:

|    |             |             |             |
|----|-------------|-------------|-------------|
| Xe | 0.00000000  | 0.00000000  | 0.00000000  |
| O  | 0.00000000  | 0.00000000  | 1.76902800  |
| O  | 1.69975300  | 0.00000000  | -0.41734600 |
| O  | -0.62672500 | -1.58002100 | -0.41720300 |
| C  | -0.39190100 | 0.57278100  | -3.90402400 |
| H  | -0.37137100 | 0.54202800  | -4.97332100 |
| N  | -0.41348100 | 0.60105800  | -2.74028800 |

### lp-Hole Interactions

$$\underline{E_{\text{MP2/aug-cc-pVTZ(PP)}} = -2.77 \text{ kcal/mol}}$$

#### Cartesian atomic coordinates:

|    |             |             |             |
|----|-------------|-------------|-------------|
| N  | 0.00000000  | 0.00000000  | 0.00000000  |
| Xe | 0.00000000  | 0.00000000  | 3.11235300  |
| O  | 1.65583200  | 0.00000000  | 2.53444400  |
| O  | -0.82714700 | 1.43513500  | 2.53625000  |
| O  | -0.82891900 | -1.43333400 | 2.53436600  |
| C  | 0.00903100  | 0.00533500  | -1.16593000 |
| H  | 0.01969900  | 0.00960600  | -2.23410600 |

## XeF<sub>2</sub>...NCH

### π-Hole Interactions

$$\underline{E_{\text{MP2/aug-cc-pVTZ(PP)}} = -3.56 \text{ kcal/mol}}$$

#### Cartesian atomic coordinates:

|    |             |            |             |
|----|-------------|------------|-------------|
| Xe | 0.00000000  | 0.00000000 | 0.00000000  |
| F  | 1.99191500  | 0.00000000 | 0.07389800  |
| F  | -1.99165500 | 0.00000000 | 0.07069700  |
| C  | -0.00736900 | 0.00000000 | -4.52206400 |
| H  | 0.00314500  | 0.00000000 | -5.59067000 |
| N  | -0.01938200 | 0.00000000 | -3.35594500 |

EEF=0.016 au

ArO<sub>3</sub>...NH<sub>3</sub>:

$\sigma$ -Hole Interactions

$E_{\text{MP2/aug-cc-pVTZ(PP)}} = -9.72 \text{ kcal/mol}$

Cartesian atomic coordinates:

|    |             |             |             |
|----|-------------|-------------|-------------|
| Ar | 0.00000000  | 0.00000000  | 0.00000000  |
| O  | 0.00000000  | 0.00000000  | 1.51083200  |
| O  | 1.39770100  | 0.00000000  | -0.42572500 |
| O  | -0.67166500 | -1.22531100 | -0.42656600 |
| N  | -0.58505400 | 0.96340100  | -2.51279600 |
| H  | -1.52220600 | 0.83166500  | -2.88295600 |
| H  | -0.01840900 | 0.29944000  | -3.03519700 |
| H  | -0.29588700 | 1.86901900  | -2.87137800 |

lp-Hole Interactions

$E_{\text{MP2/aug-cc-pVTZ(PP)}} = -1.65 \text{ kcal/mol}$

Cartesian atomic coordinates:

|    |             |             |             |
|----|-------------|-------------|-------------|
| N  | 0.00000000  | 0.00000000  | 0.00000000  |
| Ar | 0.00000000  | 0.00000000  | 3.38555800  |
| O  | 1.39781000  | 0.00000000  | 2.93372700  |
| O  | -0.69847000 | 1.21003300  | 2.93196100  |
| O  | -0.69821800 | -1.21044300 | 2.93238800  |
| H  | 0.45608700  | 0.80203800  | -0.42466600 |
| H  | -0.92481500 | -0.00864200 | -0.41981600 |
| H  | 0.46781500  | -0.79922700 | -0.41711100 |

ArF<sub>2</sub>...NH<sub>3</sub>

$\pi$ -Hole Interactions

$E_{\text{MP2/aug-cc-pVTZ(PP)}} = -4.46 \text{ kcal/mol}$

Cartesian atomic coordinates:

|    |             |             |             |
|----|-------------|-------------|-------------|
| Ar | 0.00000000  | 0.00000000  | 0.00000000  |
| F  | 1.85564800  | 0.00000000  | 0.10127000  |
| F  | -1.85569200 | -0.00092600 | 0.10012200  |
| N  | -0.00001300 | 0.02134500  | -3.11529400 |
| H  | -0.00295700 | 0.94387600  | -3.54050500 |
| H  | -0.79991400 | -0.44389200 | -3.53441800 |
| H  | 0.80271200  | -0.43886800 | -3.53456800 |

## KrO<sub>3</sub>...NH<sub>3</sub>

### $\sigma$ -Hole Interactions

$$\underline{E_{\text{MP2/aug-cc-pVTZ(PP)}} = -14.93 \text{ kcal/mol}}$$

#### Cartesian atomic coordinates:

|    |             |             |             |
|----|-------------|-------------|-------------|
| Kr | 0.00000000  | 0.00000000  | 0.00000000  |
| O  | 0.00000000  | 0.00000000  | 1.63712400  |
| O  | 1.54706500  | 0.00000000  | -0.37988200 |
| O  | -0.64181800 | 1.40802600  | -0.37908000 |
| N  | -0.35294200 | -0.56258900 | -2.53432000 |
| H  | -1.27975500 | -0.65888500 | -2.94136100 |
| H  | 0.19408300  | -1.31987700 | -2.93587700 |
| H  | 0.02700300  | 0.28186800  | -2.95635800 |

### lp-Hole Interactions

$$\underline{E_{\text{MP2/aug-cc-pVTZ(PP)}} = -3.71 \text{ kcal/mol}}$$

#### Cartesian atomic coordinates:

|    |             |             |             |
|----|-------------|-------------|-------------|
| N  | 0.00000000  | 0.00000000  | 0.00000000  |
| Kr | 0.00000000  | 0.00000000  | 3.10081000  |
| O  | 1.52374100  | 0.00000000  | 2.61918100  |
| O  | -0.75979900 | 1.32267000  | 2.62367600  |
| O  | -0.76349500 | -1.31629200 | 2.61267300  |
| H  | 0.37295000  | -0.85081800 | -0.41145300 |
| H  | 0.54713000  | 0.74249500  | -0.42623800 |
| H  | -0.91978500 | 0.09677700  | -0.42064600 |

## KrF<sub>2</sub>...NH<sub>3</sub>

### $\pi$ -Hole Interactions

$$\underline{E_{\text{MP2/aug-cc-pVTZ(PP)}} = -5.17 \text{ kcal/mol}}$$

#### Cartesian atomic coordinates:

|    |             |             |             |
|----|-------------|-------------|-------------|
| Kr | 0.00000000  | 0.00000000  | 0.00000000  |
| F  | 1.88146400  | 0.00000000  | 0.09571100  |
| F  | -1.88136100 | -0.00066900 | 0.10758300  |
| N  | -0.00189700 | 0.00625400  | -3.18387300 |
| H  | -0.00631300 | 0.92864700  | -3.60980600 |
| H  | -0.80329600 | -0.45876900 | -3.60084700 |
| H  | 0.79926200  | -0.45415900 | -3.60620800 |

## XeO<sub>3</sub>...NH<sub>3</sub>

### $\sigma$ -Hole Interactions

$$\underline{E_{\text{MP2/aug-cc-pVTZ(PP)}} = -22.07 \text{ kcal/mol}}$$

#### Cartesian atomic coordinates:

|    |             |             |             |
|----|-------------|-------------|-------------|
| Xe | 0.00000000  | 0.00000000  | 0.00000000  |
| O  | 0.00000000  | 0.00000000  | 1.79187100  |
| O  | 1.72626400  | 0.00000000  | -0.31256400 |
| O  | -0.61410600 | -1.61342500 | -0.31204600 |
| N  | -0.08771300 | 0.13319600  | -2.55563600 |
| H  | 0.38760700  | 0.91626900  | -2.99992000 |
| H  | -0.99093500 | 0.04559300  | -3.01729500 |
| H  | 0.43944800  | -0.69652300 | -2.82238600 |

### lp-Hole Interactions

$$\underline{E_{\text{MP2/aug-cc-pVTZ(PP)}} = -26.85 \text{ kcal/mol}}$$

#### Cartesian atomic coordinates:

|    |             |             |             |
|----|-------------|-------------|-------------|
| Xe | 0.00000000  | 0.00000000  | 0.00000000  |
| O  | 1.73880700  | 0.00000000  | -0.37905700 |
| O  | -0.88011200 | 1.50177700  | -0.37095200 |
| O  | -0.87096000 | -1.51551900 | -0.33681400 |
| N  | -0.02064400 | -0.02294200 | -2.34229400 |
| H  | 0.44770400  | -0.85598800 | -2.69186000 |
| H  | 0.46149400  | 0.79842100  | -2.70073500 |
| H  | -0.97834300 | -0.01652200 | -2.68615100 |

## XeF<sub>2</sub>...NH<sub>3</sub>

### $\pi$ -Hole Interactions

$$\underline{E_{\text{MP2/aug-cc-pVTZ(PP)}} = -5.46 \text{ kcal/mol}}$$

#### Cartesian atomic coordinates:

|    |             |             |             |
|----|-------------|-------------|-------------|
| Xe | 0.00000000  | 0.00000000  | 0.00000000  |
| F  | 1.99301200  | 0.00000000  | 0.11453800  |
| F  | -1.99235900 | -0.00086100 | 0.14206600  |
| N  | 0.00131200  | 0.01189000  | -3.34519300 |
| H  | -0.00020600 | 0.93311000  | -3.77397800 |
| H  | -0.79769200 | -0.45408100 | -3.76599000 |
| H  | 0.80440000  | -0.44991900 | -3.76281100 |



### ArO<sub>3</sub>...NCH

#### σ-Hole Interactions

$$\underline{E_{\text{MP2/aug-cc-pVTZ(PP)}} = -8.12 \text{ kcal/mol}}$$

#### Cartesian atomic coordinates:

|    |             |             |             |
|----|-------------|-------------|-------------|
| Ar | 0.00000000  | 0.00000000  | 0.00000000  |
| O  | 0.00000000  | 0.00000000  | 1.50867400  |
| O  | 1.39291200  | 0.00000000  | -0.43475200 |
| O  | -0.68074900 | 1.21503800  | -0.43516600 |
| C  | -0.67412400 | -1.17090000 | -3.62583400 |
| H  | -0.70555000 | -1.23251200 | -4.69674100 |
| N  | -0.63972700 | -1.10117200 | -2.46273200 |

#### lp-Hole Interactions

$$\underline{E_{\text{MP2/aug-cc-pVTZ(PP)}} = -1.48 \text{ kcal/mol}}$$

#### Cartesian atomic coordinates:

|    |             |             |             |
|----|-------------|-------------|-------------|
| N  | 0.00000000  | 0.00000000  | 0.00000000  |
| Ar | 0.00000000  | 0.00000000  | 3.33765200  |
| O  | 1.39453300  | 0.00000000  | 2.87808100  |
| O  | -0.69804100 | 1.20847900  | 2.88104000  |
| O  | -0.69833800 | -1.20787200 | 2.87993100  |
| C  | 0.00014300  | 0.00172400  | -1.16689200 |
| H  | 0.00052900  | 0.00339100  | -2.23876500 |

### ArF<sub>2</sub>...NCH

#### π-Hole Interactions

$$\underline{E_{\text{MP2/aug-cc-pVTZ(PP)}} = -4.10 \text{ kcal/mol}}$$

#### Cartesian atomic coordinates:

|    |             |            |             |
|----|-------------|------------|-------------|
| Ar | 0.00000000  | 0.00000000 | 0.00000000  |
| F  | 1.85643000  | 0.00000000 | 0.10637100  |
| F  | -1.85678700 | 0.00000000 | 0.09807800  |
| C  | 0.00668900  | 0.00000000 | -4.20478100 |
| H  | 0.00868900  | 0.00000000 | -5.27706200 |
| N  | 0.00421300  | 0.00000000 | -3.03848700 |

## KrO<sub>3</sub>...NCH

### σ-Hole Interactions

$$\underline{E_{\text{MP2/aug-cc-pVTZ(PP)}} = -11.12 \text{ kcal/mol}}$$

#### Cartesian atomic coordinates:

|    |             |             |             |
|----|-------------|-------------|-------------|
| Kr | 0.00000000  | 0.00000000  | 0.00000000  |
| O  | 0.00000000  | 0.00000000  | 1.63172800  |
| O  | 1.53512400  | 0.00000000  | -0.40874800 |
| O  | -0.65637300 | 1.38788200  | -0.40836700 |
| C  | -0.53349900 | -0.86401300 | -3.71643400 |
| H  | -0.54728300 | -0.89616700 | -4.78984000 |
| N  | -0.51721700 | -0.82745200 | -2.55194800 |

### lp-Hole Interactions

$$\underline{E_{\text{MP2/aug-cc-pVTZ(PP)}} = -2.48 \text{ kcal/mol}}$$

#### Cartesian atomic coordinates:

|    |             |             |             |
|----|-------------|-------------|-------------|
| N  | 0.00000000  | 0.00000000  | 0.00000000  |
| Kr | 0.00000000  | 0.00000000  | 3.18843800  |
| O  | 1.51486800  | 0.00000000  | 2.68634000  |
| O  | -0.75690400 | 1.31230700  | 2.68662100  |
| O  | -0.75758800 | -1.31142100 | 2.68534500  |
| C  | 0.00072800  | -0.00400200 | -1.16661100 |
| H  | 0.00301600  | -0.00690000 | -2.23864400 |

## KrF<sub>2</sub>...NCH

### π-Hole Interactions

$$\underline{E_{\text{MP2/aug-cc-pVTZ(PP)}} = -4.74 \text{ kcal/mol}}$$

#### Cartesian atomic coordinates:

|    |             |            |             |
|----|-------------|------------|-------------|
| Kr | 0.00000000  | 0.00000000 | 0.00000000  |
| F  | 1.88127700  | 0.00000000 | 0.10160300  |
| F  | -1.88127100 | 0.00000000 | 0.10751800  |
| C  | 0.00182600  | 0.00000000 | -4.27756600 |
| H  | -0.00198900 | 0.00000000 | -5.35017400 |
| N  | 0.00580600  | 0.00000000 | -3.11131800 |

## XeO<sub>3</sub>...NCH

### σ-Hole Interactions

$$\underline{E_{\text{MP2/aug-cc-pVTZ(PP)}} = -14.78 \text{ kcal/mol}}$$

#### Cartesian atomic coordinates:

|    |             |             |             |
|----|-------------|-------------|-------------|
| Xe | 0.00000000  | 0.00000000  | 0.00000000  |
| O  | 0.00000000  | 0.00000000  | 1.78475900  |
| O  | 1.71105800  | 0.00000000  | -0.35562000 |
| O  | -0.61862300 | -1.59526400 | -0.35593300 |
| C  | -0.29782000 | 0.43117200  | -3.83928000 |
| H  | -0.28447200 | 0.40891400  | -4.91405300 |
| N  | -0.31362000 | 0.45314100  | -2.67513400 |

### lp-Hole Interactions

$$\underline{E_{\text{MP2/aug-cc-pVTZ(PP)}} = -5.99 \text{ kcal/mol}}$$

#### Cartesian atomic coordinates:

|    |             |             |             |
|----|-------------|-------------|-------------|
| N  | 0.00000000  | 0.00000000  | 0.00000000  |
| Xe | 0.00000000  | 0.00000000  | 2.90437400  |
| O  | 1.67724900  | 0.00000000  | 2.38582200  |
| O  | -0.83779700 | 1.45351000  | 2.38709200  |
| O  | -0.83936400 | -1.45169500 | 2.38466900  |
| C  | -0.00045000 | -0.00112200 | -1.16532600 |
| H  | -0.00208500 | -0.00264300 | -2.23798100 |

## XeF<sub>2</sub>...NCH

### π-Hole Interactions

$$\underline{E_{\text{MP2/aug-cc-pVTZ(PP)}} = -5.12 \text{ kcal/mol}}$$

#### Cartesian atomic coordinates:

|    |             |            |             |
|----|-------------|------------|-------------|
| Xe | 0.00000000  | 0.00000000 | 0.00000000  |
| F  | 1.99187500  | 0.00000000 | 0.13460700  |
| F  | -1.99166800 | 0.00000000 | 0.13118700  |
| C  | -0.00701500 | 0.00000000 | -4.44272300 |
| H  | 0.00322000  | 0.00000000 | -5.51550700 |
| N  | -0.01805100 | 0.00000000 | -3.27647100 |
